# Supplementary material for: Agency Improves Working Memory and Accelerates Visual and Attentional Processing
Source: Research Square preprint supplement (doi:10.21203/rs.3.rs-152677/v1), 2021-01-28
Supplement: Supplementary file [file 06e44705ef119a89af555f5a.pdf]

## SUPPLEMENTARY FIGURE

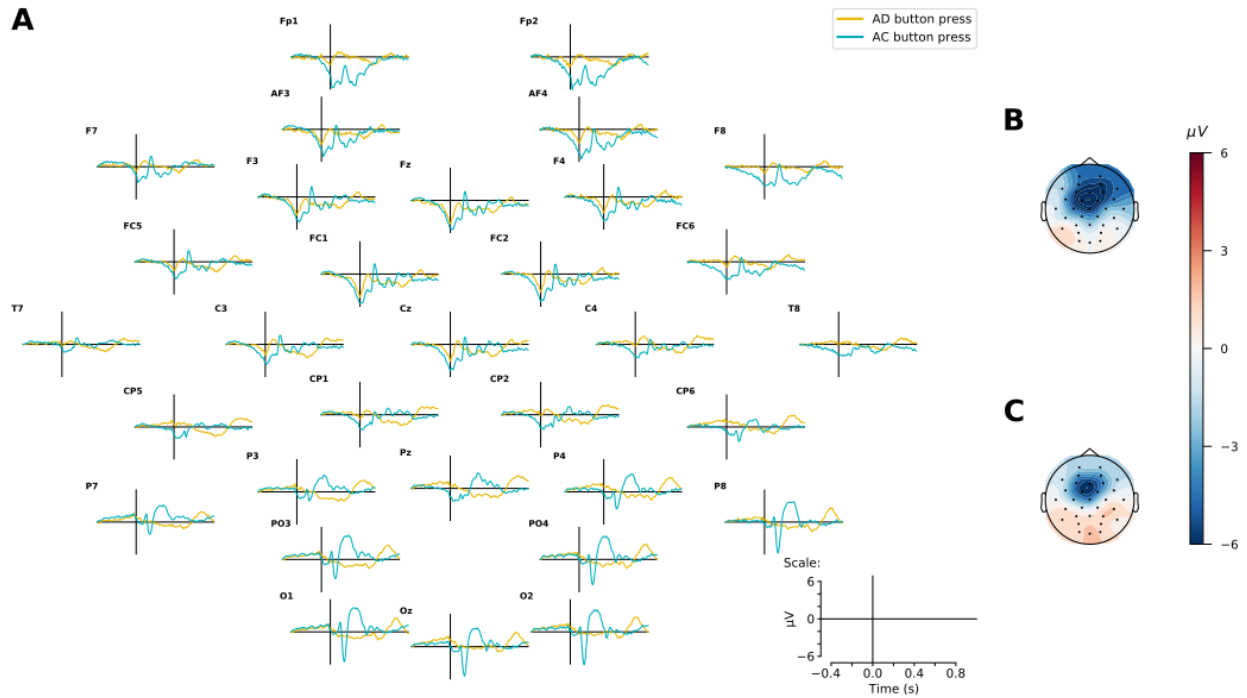

**Figure S1. Grand averages evoked by button press ( $t = 0$  ms).** **A.** Grand averages ERPs evoked by button press are depicted for all 32 channels. AC is depicted in light blue line, and AD is depicted in yellow line ( $n = 24$  subjects). **B.** Topographical plots at  $t = 0$  ms (button press) for AC condition. red: positive voltage; blue: negative voltage; values in  $\mu V$ . **C.** Same as B, but for AD condition.
